# Supplementary material for: A Qualitative Study on the Practice Patterns of Pharmacies Engaged in the Common Illness Project in Thailand
Source: Research Square preprint supplement (doi:10.21203/rs.3.rs-7949655/v1), 2025-11-04
Supplement: Supplementary file 1 [file 2ed9cc680e18c8a769c587e6.docx]

**Supplementary Table S1. Workflow steps performed by each participating pharmacy (P1–P14)**

| **Workflow step** | **P1** | **P2** | **P3** | **P4** | **P5** | **P6** | **P7** | **P8** | **P9** | **P10** | **P11** | **P12** | **P13** | **P14** | **% performed (≥ sometimes)** |
| --- | --- | --- | --- | --- | --- | --- | --- | --- | --- | --- | --- | --- | --- | --- | --- |
| **1. Eligibility verification (UC card / New Authen)** | ✔ | ✔ | ✔ | ✔ | ✔ | ✔ | ✔ | ✔ | ✔ | ✔ | ✔ | ✔ | ✔ | ✔ | **100 %** |
| **2. ID authentication & record creation** | ✔ | ✔ | ✔ | ✔ | ✔ | ✔ | ✔ | ✔ | ✔ | ✔ | ✔ | ✔ | ✔ | ✔ | **100 %** |
| **3. Structured history-taking (32 conditions)** | ✔ | ✔ | ✔ | ✔ | ✔ | ✔ | ✔ | ✔ | ✔ | ✔ | ✔ | ✔ | ✔ | ✔ | **100 %** |
| **4. Documentation in A-MED** | ✔ | ✔ | ✔ | ✔ | ✔ | ✔ | ✔ | ✔ | ✔ | ✔ | ✔ | ✔ | ✔ | ✔ | **100 %** |
| **5. Patient explanation of CI project/consent** | ✔ | ✔ | ~ | ✔ | ~ | ✔ | ✔ | ~ | ~ | ✔ | ✔ | ✔ | ~ | ✔ | **86 %** |
| **6. Use of supplementary record form (paper / Excel)** | ✖ | ✔ | ~ | ✔ | ✖ | ✔ | ✔ | ✖ | ✔ | ~ | ✔ | ✔ | ✔ | ✔ | **79 %** |
| **7. Patient confirmation (signature/photo)** | ✖ | ✖ | ✖ | ~ | ✖ | ✔ | ✖ | ✖ | ~ | ✖ | ✔ | ✔ | ✔ | ✔ | **50 %** |
| **8. Risk-factor / comorbidity recording** | ✔ | ✔ | ✖ | ✔ | ~ | ✔ | ✖ | ✔ | ✖ | ✔ | ✔ | ✔ | ✔ | ✔ | **79 %** |
| **9. Counselling and dispensing by a pharmacist** | ✔ | ✔ | ✔ | ✔ | ✔ | ✔ | ✔ | ✔ | ✔ | ✔ | ✔ | ✔ | ✔ | ✔ | **100 %** |
| **10. Follow-up at day 3 (telephone / LINE)** | ✔ | ✔ | ✔ | ✔ | ✔ | ✔ | ✔ | ✔ | ✔ | ✔ | ✔ | ✔ | ✔ | ✔ | **100 %** |
| **11. Documentation of follow-up outcome** | ✔ | ~ | ✖ | ✔ | ~ | ✔ | ✔ | ✖ | ✖ | ✔ | ✔ | ✔ | ✔ | ✔ | **79 %** |
| **12. Claim submission to NHSO** | ✔ | ✔ | ✔ | ✔ | ✔ | ✔ | ✔ | ✔ | ✔ | ✔ | ✔ | ✔ | ✔ | ✔ | **100 %** |

*Abbreviations: UC – Universal Coverage; CI – Common Illness Project; A-MED – NHSO online recording system; LINE – Thai messaging application.*
