# Supplementary material for: A Qualitative Study on the Practice Patterns of Pharmacies Engaged in the Common Illness Project in Thailand
Source: Research Square preprint supplement (doi:10.21203/rs.3.rs-7949655/v1), 2025-11-04
Supplement: Supplementary file 2 [file bb185cf4a3327bb777fd8c20.docx]

**Interview Guide and Data Recording Form**

**Study Title:** A Qualitative Study on the Practice Patterns of Pharmacies Engaged in the Common Illness (CI) Project in Thailand

**Instructions Before the Interview**

- The interviewer shall read the *Participant Information Sheet and Informed Consent Form* in full to the participant and obtain their written consent before starting the interview.
- Participants will be informed that the interview will be audio-recorded, video-recorded, and accompanied by field notes to ensure data accuracy. Permission for recording must be obtained before starting.
- During the interview, the interviewer should avoid using personal names, pronouns, or identifiable references and remind participants to do the same.
- All questions are open-ended. The interviewer should encourage participants to freely share their experiences and perspectives, and use probing questions to explore incomplete or unclear responses.

**Section A: Participant Characteristics**

1. Gender
2. Age (years)
3. Years of professional experience
4. Position in the pharmacy (Owner / Employee / Manager / Other – specify)
5. Province where the pharmacy is located
6. Health Region
7. Duration of participation in the Common Illness (CI) project (months/years)
8. Average number of CI cases served per month

**Section B: Service Provision**

**1. Service Process**

- Please describe in detail the overall service process for patients in the CI project — from the initial encounter to the end of the service.
- How do you verify patient eligibility before providing services?
- How do you collect patient history and assess presenting symptoms?
- How do you decide which medications to dispense?
- How is the dispensing and patient counselling process conducted?
- Is there any follow-up after service completion? If so, how is it performed?
- What technologies or digital systems are used to support service delivery? (e.g., AMED system, Line Official, or others)
- Do you use any paper-based forms or supplementary documentation beyond the central system?
- Do you use any clinical tools or devices to assess patients? (e.g., blood pressure monitors, glucometers, thermometers)

**2. Pharmaceutical Supply Management**

- Please describe how you manage drug procurement, storage, and inventory control for the CI project.
- Do you maintain a separate stock for CI project medicines?
- How do you handle unused, expired, or damaged medicines?
- Have you encountered any difficulties in procurement, supply, or reimbursement from related agencies?
- Do you use any herbal or non-listed medicines beyond the standard CI formulary?
- How are logistics (e.g., delivery, cold-chain, stock transfer) managed in your pharmacy for this project?

**3. Patient Follow-Up**

- How do you follow up with patients after providing services? (e.g., phone calls, Line application, in-person visits)
- How frequently are follow-ups performed?
- How do you record and store follow-up information?
- Have you experienced any difficulties in patient follow-up? (e.g., unreachable numbers, patient relocation, non-response)
- How do you manage cases in which the patient’s condition does not improve or worsens? (e.g., referral to hospital, consultation with other professionals)

**4. Coordination with Other Agencies**

- How do you coordinate or communicate with external organisations such as NHSO, hospitals, or clinics?
- What challenges or barriers have you experienced in inter-agency coordination?
- What factors facilitate successful coordination and information sharing?

**5. Use of Technology**

- What types of technology or digital tools are used in your CI project operations?
- Which systems are most valuable and convenient?
- What limitations or obstacles have you encountered with these technologies?
- Are there any specific features or improvements you would recommend to enhance their usefulness?

**Section C: Challenges and Barriers**

1. What challenges or barriers did you encounter in joining the CI project?
   - (e.g., complicated registration, required documents, training processes)
2. What challenges or obstacles did you face during service delivery?
   - (e.g., medicine shortage, insufficient equipment, queue management, coordination with agencies, patient follow-up difficulties)
3. Have you experienced any problems related to financial reimbursement from the NHSO?
   - (e.g., delays in payment, data verification issues, discrepancies in submission)
4. Have you faced any difficulties or concerns regarding the taxation of income generated through the CI project?
5. Are there any other issues or barriers you have experienced in providing services under this project that were not mentioned above?

**Section D: Suggestions for Improvement**

- What suggestions or recommendations would you make to improve the CI project’s design, service process, or implementation?
- How can the project be enhanced to ensure long-term sustainability and efficiency for community pharmacies?

**Section E: Values and Impacts**

1. In your opinion, how has the CI project affected:
   - Your pharmacy’s operations
   - Patients and their health outcomes
   - The broader healthcare system

*(Please describe both positive and negative impacts.)*

1. What values or benefits has this project created for pharmacists, pharmacies, and the community?
   - (e.g., professional development, patient trust, health promotion, community engagement)

**Closing Remarks**

- Thank the participant for their time and valuable insights.
- Reassure the participant that their responses will remain confidential and used solely for research purposes.
- Confirm consent for use of anonymised quotations in publications, if applicable.
